# Supplementary material for: Novel Polymorphic Cocrystals of the Non-Steroidal Anti-Inflammatory Drug Niflumic Acid: Expanding the Pharmaceutical Landscape
Source: MDPI journal article supplement (doi:10.3390/pharmaceutics13122140), 2021-12-13
Supplement: s1 [file s1]

## Article

# Supplementary Materials: Novel Polymorphic cocrystals of the non-steroidal anti-inflammatory Drug Niflumic acid: expanding pharmaceutical landscape

Francisco Javier Acebedo-Martínez, Carolina Alarcón-Payer, Antonio Frontera, Rafael Barbas, Rafel Prohens, Milena Di Crisci, Alicia Domínguez-Martín, Jaime Gómez-Morales and Duane Choquesillo-Lazarte

Figure S1. PXRD pattern of the solid material obtained by liquid assisted grinding (LAG) with water, the simulated patterns from crystal structures and the corresponding reactants.

Figure S2. Rietveld profile fit (red line) to the experimental PXRD data (blue line) of NIF–CAF Form I (a) and NIF–CAF Form II (b). The profile fitting for both the cocrystals shows low discrepancy (grey line).

Figure S3. PXRD patterns of NIF–CAF after annealing of Form II at 130 °C during 24 h.

Figure S4. ORTEP representation showing the asymmetric unit of NIF–CAF Form I with atom numbering scheme (thermal ellipsoids are plotted with the 50% probability level).

Figure S5. ORTEP representation showing the asymmetric unit of NIF–CAF Form II with atom numbering scheme (thermal ellipsoids are plotted with the 50% probability level).

Figure S6. Comparison of Fourier transform infrared (FT–IR) spectra of NIF, CAF and NIF–CAF polymorphs.

Figure S7. PXRD patterns of the solid material obtained after slurry assay in octane (OCT) at selected temperature.

Figure S8. DSC of NIF–CAF Cocrystal Form I.

Figure S9 TGA of NIF–CAF Cocrystal Form I.

Figure S10. DSC of NIF–CAF Cocrystal Form II.

Figure S11. TGA of NIF–CAF Cocrystal Form II.

Figure S12. PXRD patterns of NIF–CAF cocrystal forms after the competitive slurry experiments using an equimolar mixture of both polymorphs in a selection of solvents.

Figure S13. PXRD patterns of NIF–CAF cocrystal polymorphs with respect to the stability under accelerated ageing conditions (40 °C, 75% RH) at different time intervals.

Figure S14. PXRD patterns of NIF–CAF cocrystal polymorphs after the powder dissolution profile assay.

Table S1. Solvents added in the LAG syntheses and the resulting polymorph of the NIF–CAF cocrystal solvent screening grinding.

Table S2. Solvents used for single crystal growth by solvent evaporation method.

Table S3. Solvents used for the competitive slurry experiments using an equimolar mixture of both polymorphs.

Table S4. Hydrogen bonds for NIF—CAF cocrystal polymorphs [Å and deg.].

Table S5.  $\pi,\pi$ -stacking interactions analysis of compound NIF—CAF Form II.

Table S6. Maximum apparent solubility ( $S_{\max}$ ) of NIF and its NIF-CAF Cocrystal polymorphs in pH 7.4 phosphate buffer medium.

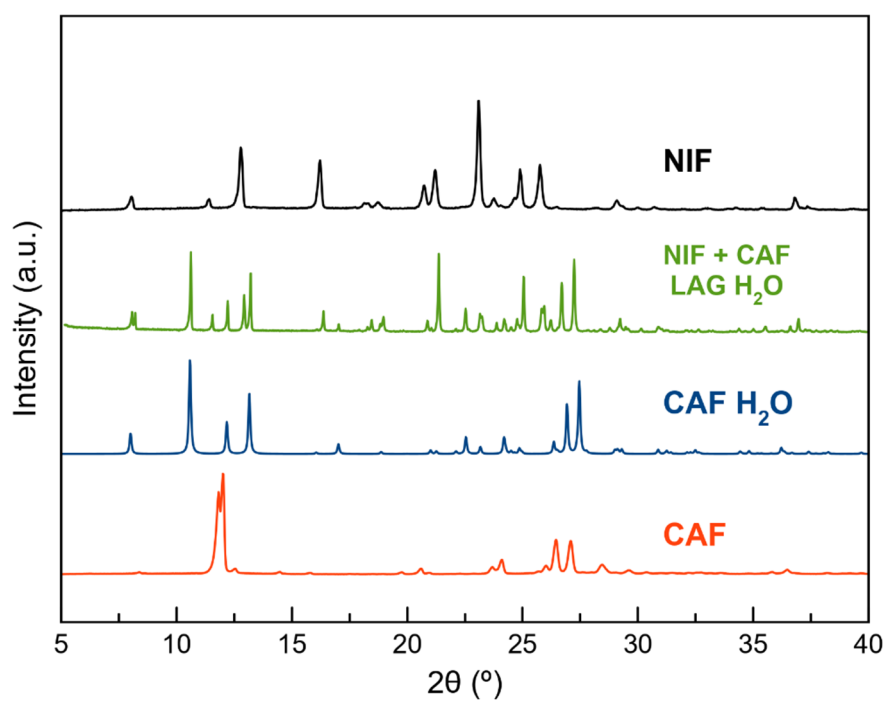

**Figure S1.** PXRD pattern of the solid material obtained by liquid assisted grinding (LAG) with water, the simulated patterns from crystal structures and the corresponding reactants.

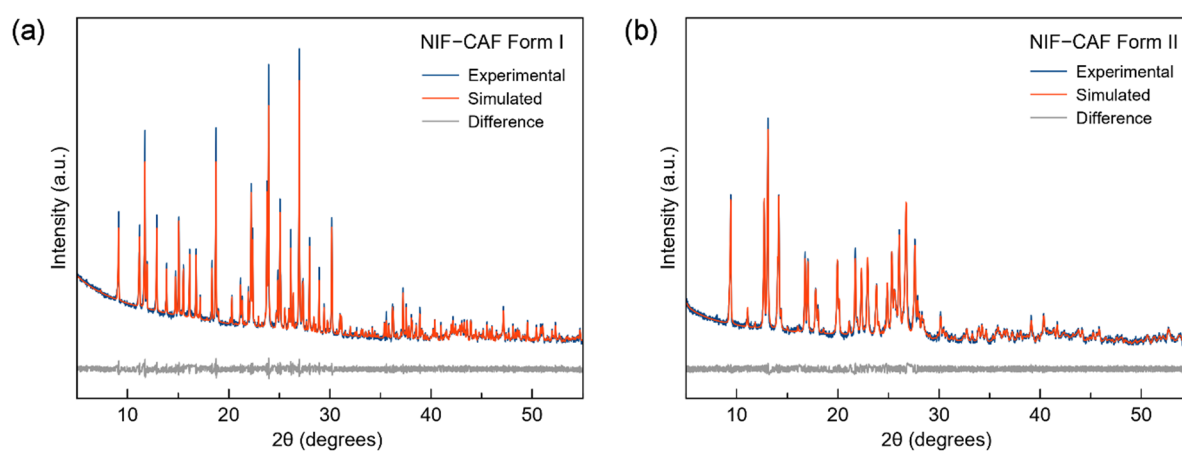

**Figure S2.** Rietveld profile fit (red line) to the experimental PXRD data (blue line) of NIF-CAF Form I (a) and NIF-CAF Form II (b). The profile fitting for both the cocrystals shows low discrepancy (grey line).

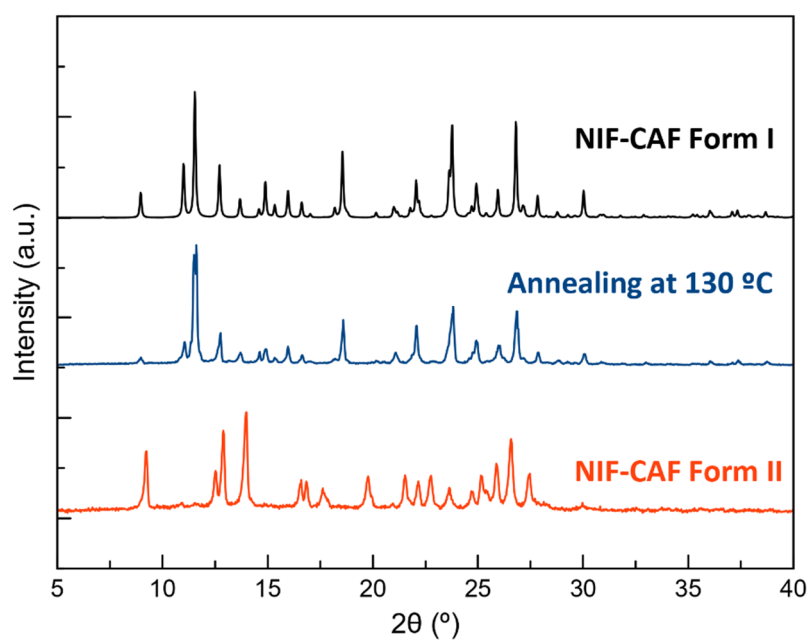

**Figure S3.** PXRD patterns of NIF-CAF after annealing of Form II at 130 °C during 24 h.

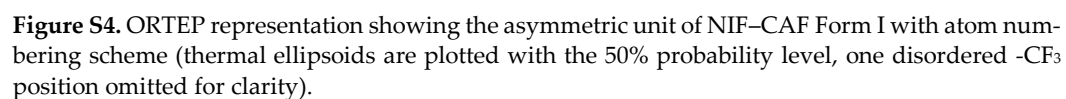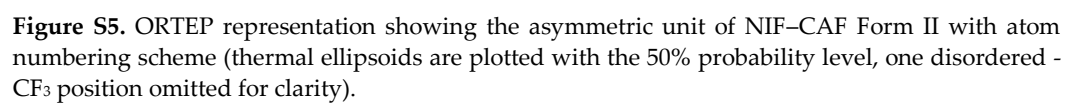

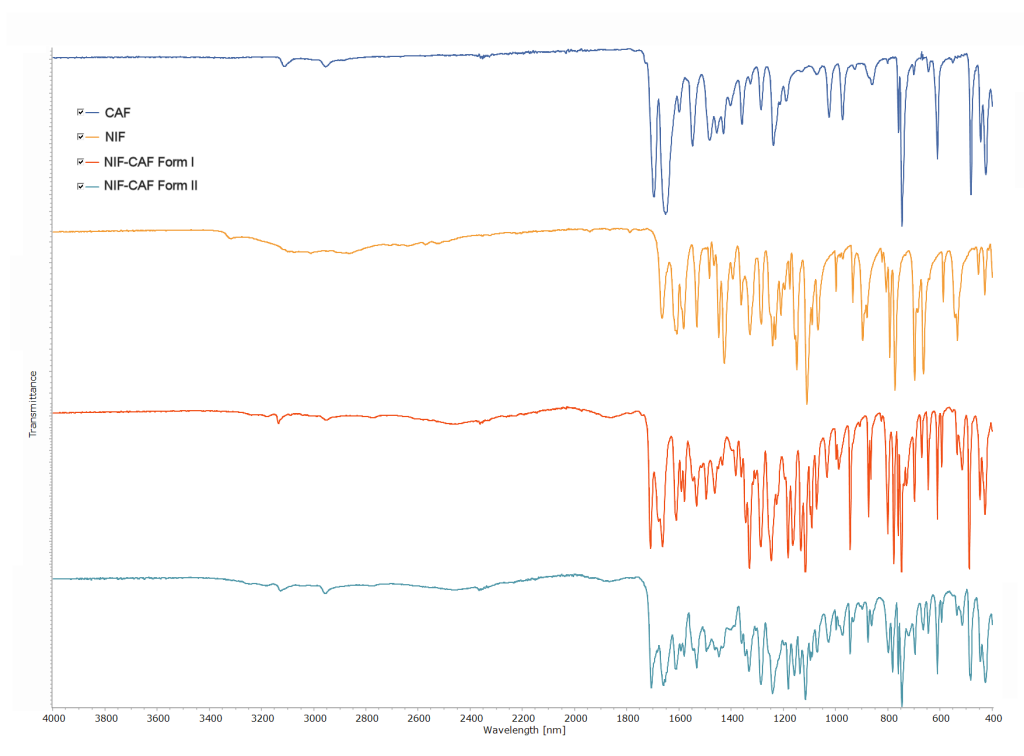

**Figure S6.** Comparison of Fourier transform infrared (FT-IR) spectra of NIF, CAF and NIF-CAF polymorphs.

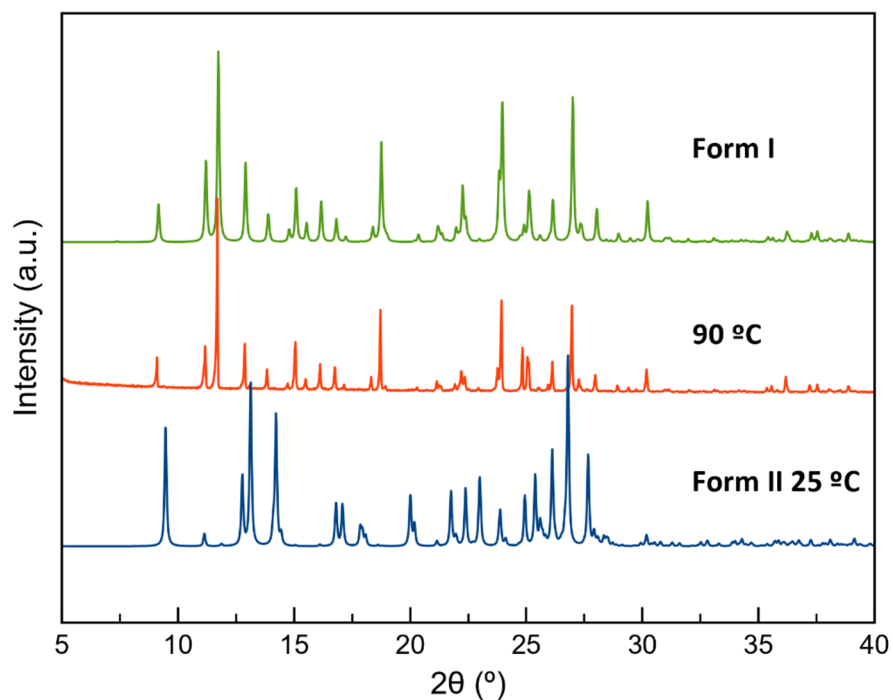

**Figure S7.** PXRD patterns of the solid material obtained after slurry assay of Form II in octane (OCT) at selected temperature.

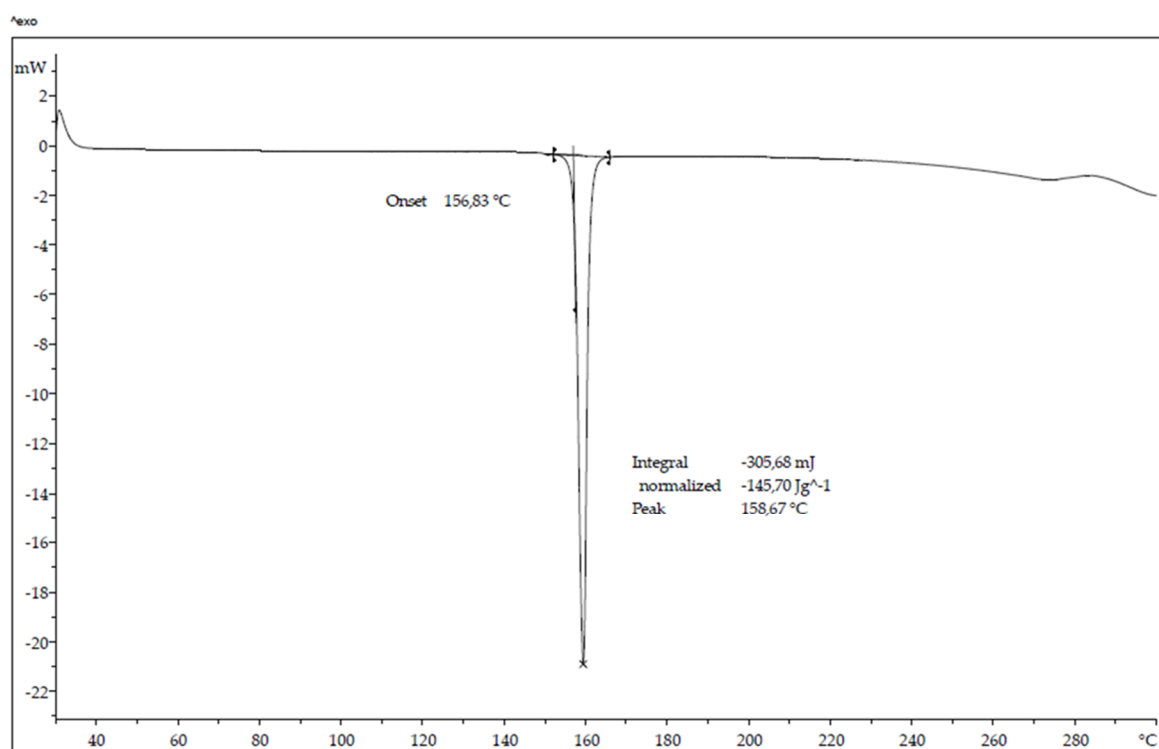

Figure S8. DSC of NIF-CAF Cocrystal Form I.

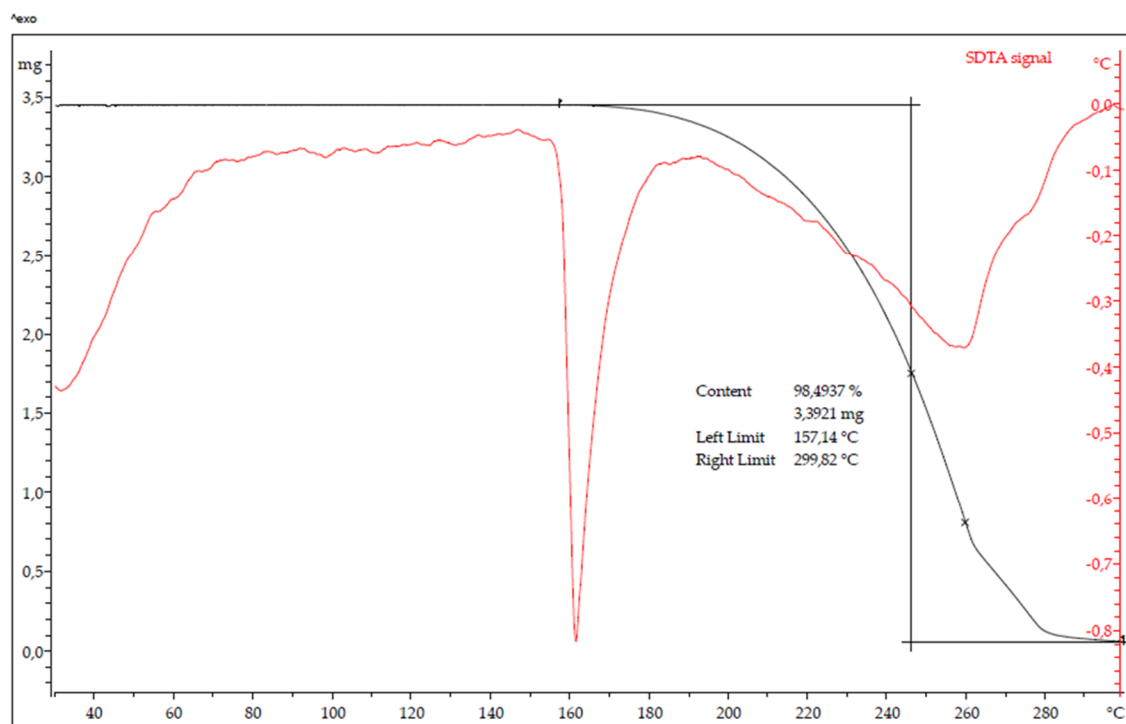

Figure S9. TGA of NIF-CAF Cocrystal Form I.

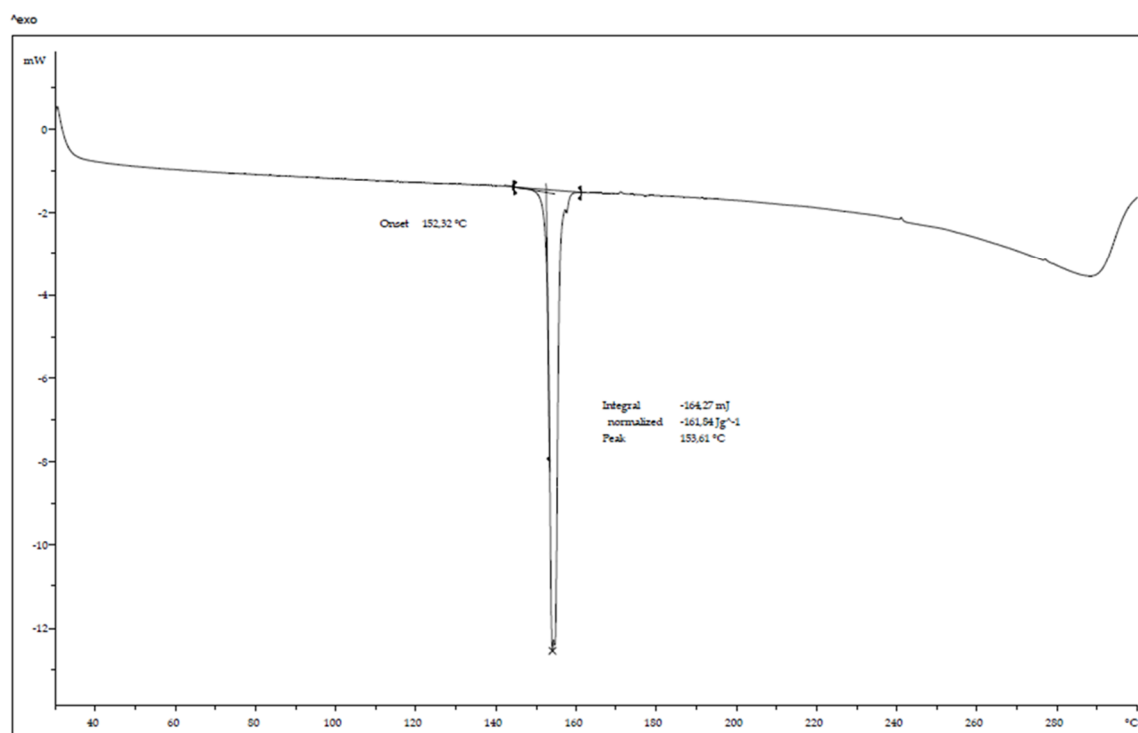

Figure S10. DSC of NIF-CAF Cocrystal Form II.

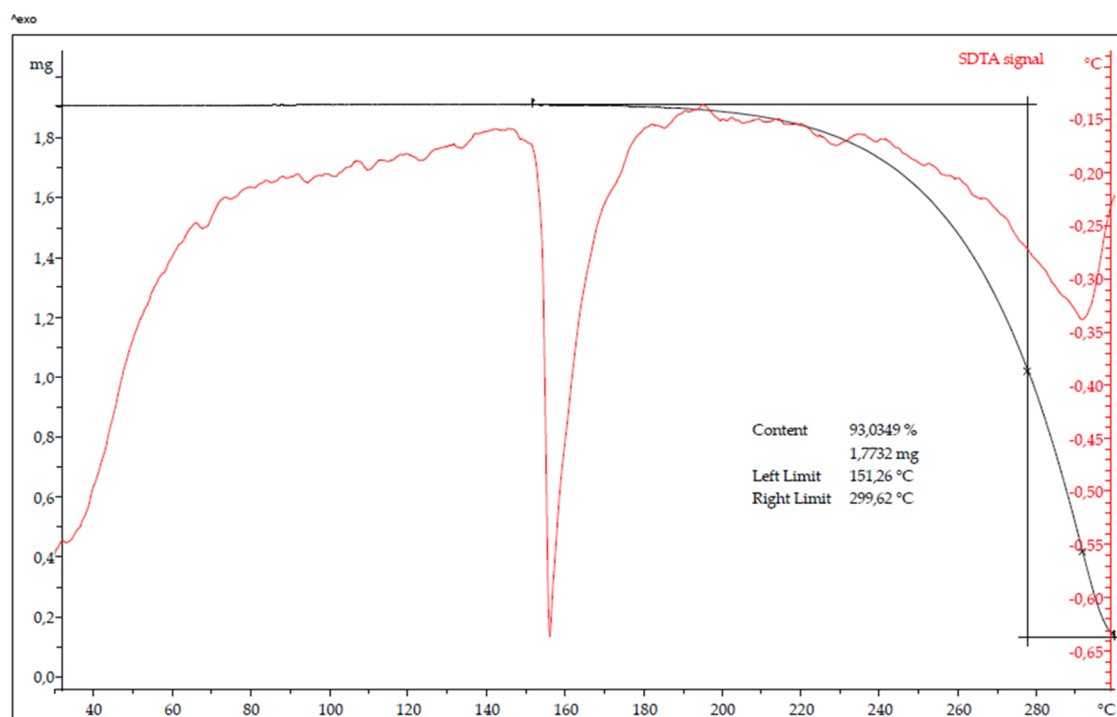

Figure S11. TGA of NIF-CAF Cocrystal Form II.



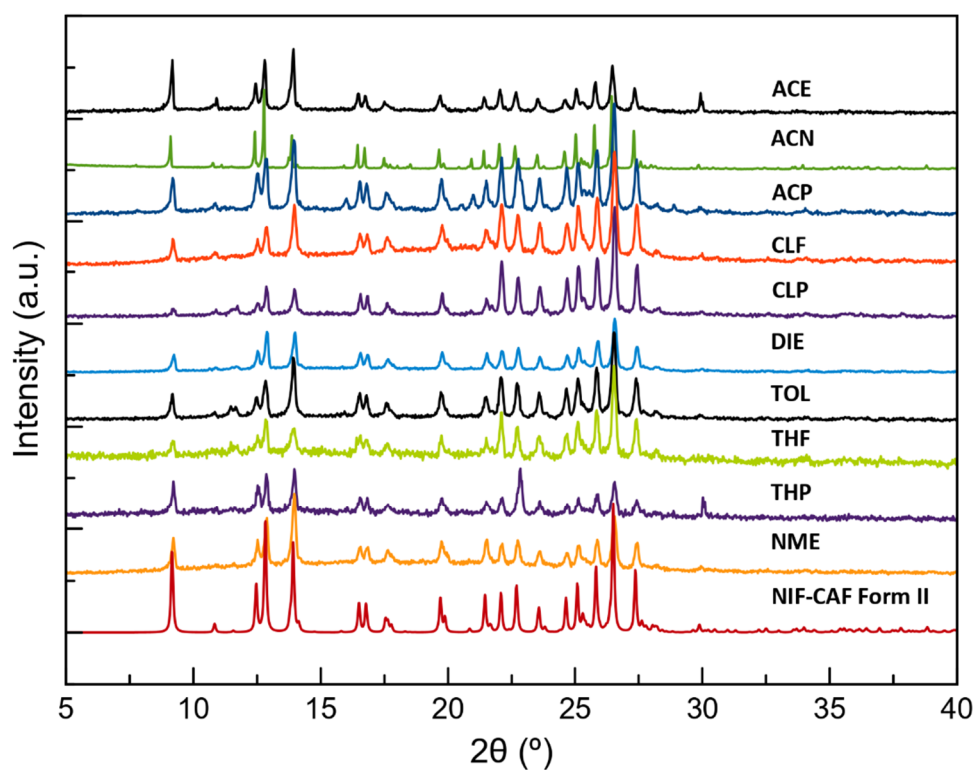

**Figure S12.** PXRD patterns of NIF-CAF cocrystal forms after the competitive slurry experiments using an equimolar mixture of both polymorphs in a selection of solvents. ACE: acetone; ACN: acetonitrile; ACP: acetophenone; CLF: chloroform; CLP: cyclopentane; DIE: diisopropyl ether; TOL: toluene; THF: tetrahydrofuran; THP: tetrahydropyran; NME: nitromethane.

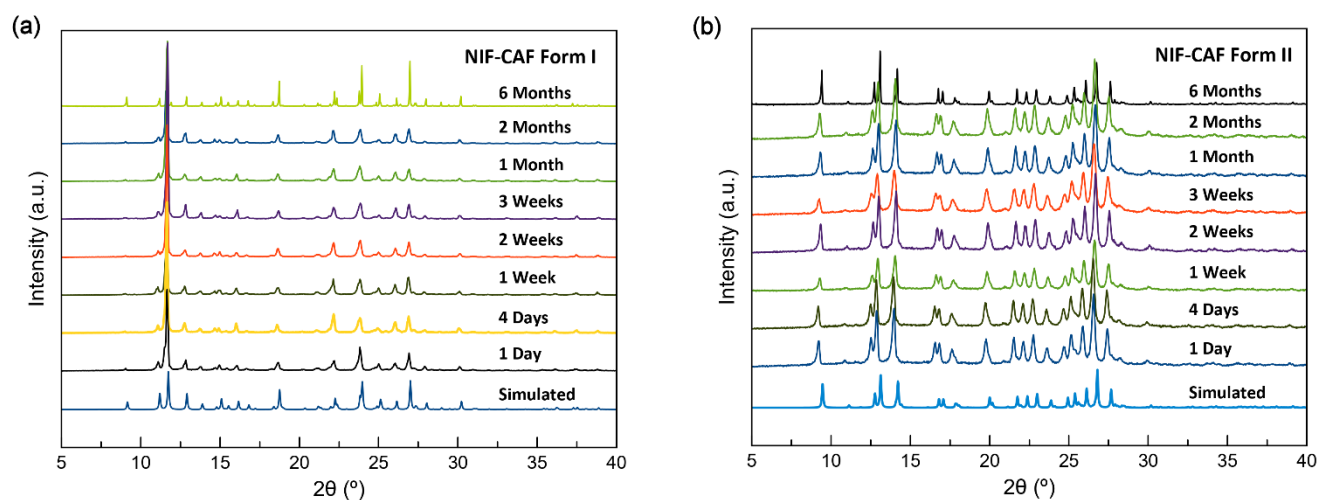

**Figure S13.** PXRD patterns of NIF-CAF cocrystal polymorphs with respect to the stability under accelerated ageing conditions (40 °C, 75% RH) at different time intervals.

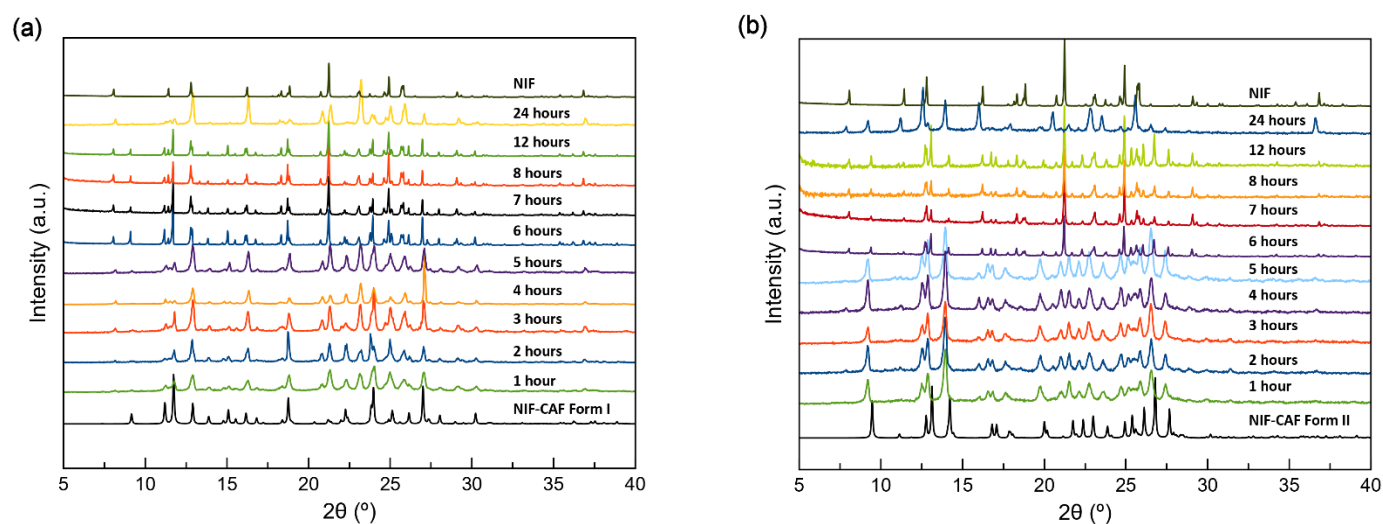

**Figure S14.** PXRD patterns of NIF-CAF cocrystal polymorphs after the powder dissolution profile assay.

**Table S1.** Solvents added in the LAG syntheses and the resulting polymorph of the NIF–CAF co-crystal solvent screening grinding.

| SOLVENT          | NIF–CAF cocrystal polymorph             |
|------------------|-----------------------------------------|
| ACE              | Form II                                 |
| ACN              | Form II                                 |
| ACP              | Form I                                  |
| BNA              | Form II                                 |
| BUT              | Form II                                 |
| CLF              | Form I                                  |
| DCM              | Form I                                  |
| DIE              | Form II                                 |
| EOH              | Form II                                 |
| ETA              | Form II                                 |
| H <sub>2</sub> O | Mixture of NIF and CAF·H <sub>2</sub> O |
| MET              | Form II                                 |
| NME              | Form I                                  |
| THF              | Form II                                 |
| THP              | Form II                                 |
| TOL              | Form II                                 |

ACE: acetone; ACN: acetonitrile; ACP: acetophenone; BNA: butanone; CLF: chloroform; DCM: dichloromethane; DIE: diisopropyl ether; EOH: ethanol; ETA: ethylacetate; H<sub>2</sub>O: water; MET: methanol; NME: nitromethane; THF: tetrahydrofuran; THP: tetrahydropyran; TOL: toluene.

**Table S2.** Solvents used for single crystal growth by solvent evaporation method.

| SOLVENT | Polymorphic outcome | Evaporation rate |
|---------|---------------------|------------------|
| ACE     | Form I + NIF        | Fast             |
| ACN     | Form I +NIF         | Fast             |
| ACP     | Form I + NIF        | Fast             |
| DIE     | Form II +NIF        | Fast             |
| NME     | Form I + NIF        | Fast             |
| THF     | Form I + NIF        | Fast             |
| THP     | Form I + NIF        | Fast             |
| ACN     | Form II             | Slow             |

ACE: acetone; ACN: acetonitrile; ACP: acetophenone; DIE: diisopropyl ether; NME: nitromethane; THF: tetrahydrofuran; THP: tetrahydropyran.

**Table S3.** Solvents used for the competitive slurry experiments using an equimolar mixture of both polymorphs.

| SOLVENT | Polymorphic outcome |
|---------|---------------------|
| ACE     | Form II             |
| ACN     | Form II             |
| ACP     | Form I              |
| CLF     | Form I              |
| DIE     | Form II             |
| NME     | Form I              |
| THF     | Form II             |
| THP     | Form II             |
| TOL     | Form II             |

**Table S4.** Hydrogen bonds for NIF–CAF cocrystal polymorphs [Å and deg.].

## Form I

| D-H...A             | d(D-H) | d(H...A) | d(D...A) | <(DHA) |
|---------------------|--------|----------|----------|--------|
| O(3)-H(3)···N(29)   | 0.82   | 1.86     | 2.673(4) | 173.7  |
| N(10)-H(10)···O(1)  | 0.86   | 1.97     | 2.678(4) | 139.2  |
| C(5)-H(5)···O(22)#1 | 0.93   | 2.49     | 3.163(5) | 129.3  |
| C(16)-H(16)···N(8)  | 0.93   | 2.25     | 2.843(5) | 120.7  |

Symmetry transformations used to generate equivalent atoms: #1 -x,-y+1,-z

## Form II

| D-H...A              | d(D-H) | d(H...A) | d(D...A)   | <(DHA) |
|----------------------|--------|----------|------------|--------|
| O(3)-H(3)···N(29)    | 0.82   | 1.87     | 2.6853(19) | 179.9  |
| N(10)-H(10)···O(1)   | 0.86   | 1.94     | 2.663(2)   | 140.8  |
| C(5)-H(5)···O(003)#1 | 0.93   | 2.50     | 3.171(2)   | 129.2  |
| C(12)-H(12)···N(8)   | 0.93   | 2.34     | 2.925(3)   | 120.9  |
| C(28)-H(28)···O(1)   | 0.93   | 2.46     | 3.097(2)   | 125.8  |

Scheme 1. -x+1,-y,-z+1 .

**Table S5.** a). Analysis of  $\pi,\pi$ -stacking and C-H...  $\pi$  interactions analysis of the NIF—CAF cocrystal polymorphs.

| Form I               |     |     |     |     |     |     |     |     |     |     |
|----------------------|-----|-----|-----|-----|-----|-----|-----|-----|-----|-----|
| 6-Membered Ring ( 2) | C11 | --> | C12 | --> | C13 | --> | C14 | --> | C15 | --> |
| 5-Membered Ring ( 3) | N27 | --> | C25 | --> | C24 | --> | N29 | --> | C28 | --> |
| 6-Membered Ring ( 4) | N21 | --> | C22 | --> | N23 | --> | C24 | --> | C25 | --> |

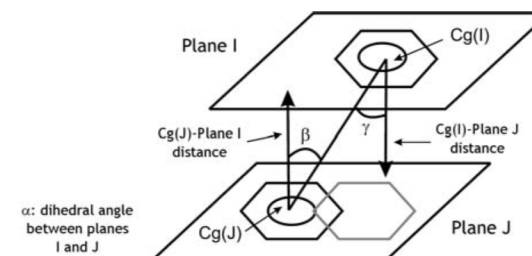


---



---

Analysis of Short Ring-Interactions with Cg-Cg Distances < 6.0 Ang., Alpha < 20.000 Deg. and Beta < 60.0 Deg.

---



---

| Cg(I) Res(I) | Cg(J)       | [ ARU(J)]  | Cg-Cg Transformed J-Plane P, Q, R, S |         |         |         |          | Alpha    | Beta | Gamma | CgI_Perp   | CgJ_Perp   | Slippage |
|--------------|-------------|------------|--------------------------------------|---------|---------|---------|----------|----------|------|-------|------------|------------|----------|
| Cg2          | [ 1] -> Cg3 | [ 1556.02] | 3.661(3)                             | 0.2689  | 0.8551  | 0.4432  | 13.5770  | 5.0(2)   | 14.5 | 19.4  | 3.4538(16) | 3.5434(16) | 0.920    |
| Cg2          | [ 1] -> Cg4 | [ 1556.02] | 3.730(3)                             | 0.2692  | 0.8440  | 0.4640  | 13.6863  | 4.31(18) | 22.2 | 22.3  | 3.4504(16) | 3.4525(15) | 1.411    |
| Cg3          | [ 2] -> Cg2 | [ 1554.01] | 3.661(3)                             | 0.2023  | 0.8430  | 0.4984  | 5.7651   | 5.0(2)   | 19.4 | 14.5  | 3.5434(16) | 3.4537(16) | 1.214    |
| Cg4          | [ 2] -> Cg2 | [ 1554.01] | 3.730(3)                             | 0.2023  | 0.8430  | 0.4984  | 5.7651   | 4.31(18) | 22.3 | 22.2  | 3.4526(15) | 3.4503(16) | 1.416    |
| Cg4          | [ 2] -> Cg4 | [ 3665.02] | 3.515(2)                             | -0.2692 | -0.8440 | -0.4640 | -12.9569 | 0.00(17) | 13.6 | 13.6  | 3.4164(15) | 3.4164(15) | 0.825    |

[1556] = X,Y,1+Z

[1554] = X,Y,-1+Z

[3665] = 1-X,1-Y,-Z

---



---

Analysis of Y-X...Cg(Pi-Ring) Interactions (X..Cg < 4.0 Ang. - Gamma < 30.0 Deg)

---



---

| Y--X(I) | Res(I) | Cg(J)       | [ ARU(J)]  | X..Cg      | Transformed J-Plane P, Q, R, S |         |         |          | X-Perp Gamma |       | Y-X..Cg  | Y..Cg    | Y-X,Pi |      |
|---------|--------|-------------|------------|------------|--------------------------------|---------|---------|----------|--------------|-------|----------|----------|--------|------|
| C22     | -O22   | [ 2] -> Cg1 | [ 1554.01] | 3.425(4)   | 0.3668                         | 0.8345  | 0.4112  | 6.6051   | 3.284        | 16.46 | 105.6(3) | 3.931(5) | 0.42   |      |
| C22     | -O22   | [ 2] -> Cg3 | [ 3665.02] | 3.407(4)   | -0.2689                        | -0.8551 | -0.4432 | -13.1133 | 3.354        | 10.09 | 84.4(2)  | 3.504(5) | 2.49   |      |
|         |        |             |            | Min or Max | 3.407                          |         |         |          |              | 3.284 | 10.1     | 105.60   | 3.504  | 2.49 |

[ 1554] = X,Y,-1+Z

[ 3665] = 1-X,1-Y,-Z

Table S5(b). Analysis of  $\pi,\pi$ -stacking and C-H $\cdots\pi$  interactions analysis of the NIF—CAF cocrystal polymorphs.

## Form II

|                     |     |     |     |     |     |     |     |     |     |     |     |     |
|---------------------|-----|-----|-----|-----|-----|-----|-----|-----|-----|-----|-----|-----|
| 6-Membered Ring (1) | N8  | --> | C7  | --> | C6  | --> | C5  | --> | C4  | --> | C9  | --> |
| 6-Membered Ring (2) | C11 | --> | C12 | --> | C13 | --> | C14 | --> | C15 | --> | C16 | --> |
| 5-Membered Ring (3) | N27 | --> | C25 | --> | C24 | --> | N29 | --> | C28 | --> |     |     |
| 6-Membered Ring (4) | N21 | --> | C22 | --> | N23 | --> | C24 | --> | C25 | --> | C26 | --> |

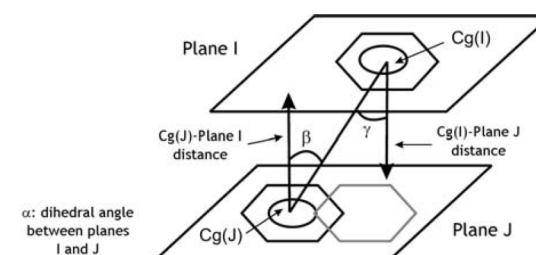

Analysis of Short Ring-Interactions with Cg-Cg Distances < 6.0 Ang., Alpha < 20.000 Deg. and Beta < 60.0 Deg.

| Cg(I) | Res(I)      | Cg(J)      | [ ARU(J)]  | Cg-Cg Transformed J-Plane P, Q, R, S |        |        |        |          | Alpha | Beta | Gamma     | CgI_Perp  | CgJ_Perp | Slippage |
|-------|-------------|------------|------------|--------------------------------------|--------|--------|--------|----------|-------|------|-----------|-----------|----------|----------|
| Cg1   | [ 1] -> Cg3 | [ 1655.02] | 3.6704(11) | -0.4606                              | 0.8334 | 0.3055 | 1.5905 | 1.08(10) | 23.0  | 21.9 | 3.4049(8) | 3.3786(7) | 1.434    |          |
| Cg3   | [ 2] -> Cg1 | [ 1455.01] | 3.6705(11) | -0.4731                              | 0.8313 | 0.2916 | 7.9751 | 1.08(10) | 21.9  | 23.0 | 3.3785(7) | 3.4050(8) | 1.371    |          |
| Cg3   | [ 2] -> Cg2 | [ 1445.01] | 4.1995(12) | -0.3238                              | 0.8766 | 0.3559 | 1.7909 | 8.72(10) | 32.7  | 24.9 | 3.8103(7) | 3.5342(8) | 2.268    |          |
| Cg4   | [ 2] -> Cg1 | [ 1445.01] | 4.2087(11) | -0.4731                              | 0.8313 | 0.2916 | 1.2227 | 0.44(8)  | 36.2  | 36.5 | 3.3839(7) | 3.3969(8) | 2.485    |          |
| Cg4   | [ 2] -> Cg1 | [ 1455.01] | 4.2702(11) | -0.4731                              | 0.8313 | 0.2916 | 7.9751 | 0.44(8)  | 37.5  | 37.9 | 3.3685(7) | 3.3882(8) | 2.599    |          |

[1655] = 1+X,Y,Z

[1445] = -1+X,-1+Y,Z

[1455] = -1+X,Y,Z

Analysis of Y-X...Cg(Pi-Ring) Interactions (X..Cg < 4.0 Ang. - Gamma < 30.0 Deg)

| Y--X(I)  | Res(I)      | Cg(J)      | [ ARU(J)] | X..Cg      | Transformed J-Plane P, Q, R, S |        |         |        |        | X-Perp | Gamma | Y-X..Cg   | Y..Cg      | Y-X,Pi |
|----------|-------------|------------|-----------|------------|--------------------------------|--------|---------|--------|--------|--------|-------|-----------|------------|--------|
| C17-F20A | [ 1] -> Cg2 | [ 2755.01] |           | 3.794(10)  | 0.3238                         | 0.8766 | -0.3559 | 8.7483 | -3.480 | 23.48  |       | 149.4(7)  | 4.983(3)   | 81.46  |
| C22-O22  | [ 2] -> Cg1 | [ 1445.01] |           | 3.4403(17) | -0.4731                        | 0.8313 | 0.2916  | 1.2227 | 3.419  | 6.40   |       | 86.78(11) | 3.5840(19) | 0.98   |
| C17-F20B | [ 1] -> Cg2 | [ 2755.01] |           | 3.83(2)    | 0.3238                         | 0.8766 | -0.3559 | 8.7483 | -3.700 | 15.03  |       | 150.6(11) | 4.983(3)   | 58.91  |

[ 2755] = 5/2-X,1/2+Y,1/2-Z

[ 1445] = -1+X,-1+Y,Z

**Table S6.** Maximum apparent solubility ( $S_{\max}$ ) of NIF and its NIF-CAF Cocrystal polymorphs in pH 7.4 phosphate buffer medium.

|         | $S_{\max}$ (mg·mL <sup>-1</sup> ) | Solubility enhancement |
|---------|-----------------------------------|------------------------|
| NIF     | 2.25                              |                        |
| Form I  | 24.39                             | 10.84X                 |
| Form II | 21.51                             | 9.56X                  |
